# Supplementary material
Source: publisher figshare collection journal article supplement (https://gsajournals.figshare.com/ndownloader/files/14078117)
Supplement: Supplementary file 1 [file 14078117]

***S. pombe* Kinase Deletion Library Sensitive/Resistant Strains (including sorbitol data)**

**KEY for sensitivity**

null no observed sensitivity

- mild sensitivity

- - moderate sensitivity

- - - extreme sensitivity

+ resistance

0 lethal

**KEY for sorbitol rescue**

N/A not sensitive strain

0 no observable difference

+ slightly rescued

++ fully rescued

Table 1. BHA S/R Strains

| Well | Gene | Exhibited Sensitivity | Rescued by Sorbitol | Function | GO Annotation |
| --- | --- | --- | --- | --- | --- |
| *A2* | *byr1* | - - | + |  | MAPK cascade, cell cycle arrest in response to pheromone, cellular response to nitrogen starvation, protein phosphorylation, signal transduction involved in conjugation with cellular fusion |
| *A3* | *byr2* | - - | ++ |  | MAPK cascade, cell cycle arrest in response to pheromone, induction of conjugation upon nitrogen starvation, protein phosphorylation, signal transduction involved in conjugation with cellular fusion |
| *A7* | *cek1* | - - | + |  | Activation of bipolar cell growth, protein phosphorylation, regulation of mitotic cell cycle, signal transduction |
| *A8* | *chk1* | - | 0 |  | DNA damage checkpoint, protein phosphorylation |
| *A9* | *cki1* | - | 0 |  | Protein phosphorylation, regulation of endocytosis, signal transduction, regulation of 1-phosphatidylinositol-4phosphate 5-kinase activity |
| *A10* | *cki2* | - | 0 |  | Protein phosphorylation, regulation of cell shape, regulationof endocytosis, signal transduction |
| *A11* | *cki3* | - | 0 |  | Protein phosphorylation, regulation of endocytosis, signal transduction |
| *A12* | wt972 | - | + |  |  |
| *B1* | *cmk1* | - | + |  | Activation of bipolar cell growth, calcium-mediated signaling, protein phosphorylation, regulation of mitotic cell cycle |
| *B2* | *cmk2* | - | ++ |  | Activation of bipolar cell growth, cellular response to oxidative stress, mitotic cell cycle DNA replication checkpoint, negative regulation of G2/M transition of mitotic cell cycle, protein phosphorylation, regulation of G2/M transition of mitotic cell cycle, stress-activated protein kinase signaling cascade |
| *B5* | *fin1* | - | ++ |  | Barrier septum assembly involved in cell cycle cytokinesis, cellular protein localization, mitotic chromosome condensation, negative regulation of septation initiation signaling cascade, protein phosphorylation, regulation of mitotic cell cycle, septation initiation signaling cascade, spindle assembly involved in mitosis |
| *B6* | *gad8* | - | + |  | TOR signaling cascade, induction of conjugation upon nitrogen starvation, negative regulation of establishment or maintenance of bipolar cell polarity regulating cell shape, protein phosphorylation, regulation of mitotic cell cycle |
| *B7* | *gsk3* | - | 0 |  | Activation of bipolar cell growth, positive regulation of chromosome segregation, protein phosphorylation, regulation of cell cycle cytokinesis, regulation of mitotic sister chromatid segregation, signal transduction |
| *B8* | *gsk31* | - | 0 |  | Protein phosphorylation, proteolysis, signal transduction |
| *B9* | *hhp1* | - - | + |  | Activation of bipolar cell growth, attachment of spindle microtubules to kinetochore involved in homologous chromosome segregation, homologous chromosome segregation, protein phosphorylation, regulation of DNA repair, signal transduction |
| *B10* | *hhp2* | - - | + |  | attachement of spindle microtubules to kinetochore involved in homologous chromosome segregation, homologous chromosome segregation, protein phosphorylation, regulation of DNA repair, signal transduction |
| *B11* | *hri1* | - - | 0 |  | Cellular response to stress, cytoplasmic translational initiation, negative regulation of translational initiation in response to osmotic stress, protein phosphorylation |
| *B12* | wt972 | - | + |  |  |
| *C3* | *kin1* | - - - | + |  | Activation of bipolar cell growth, cellular response to stress, establishment or maintenance of actin cytoskeleton polarity, establishment or maintenance of cell polarity regulating cell shape, protein phosphorytlation, regulation of microtubule-based movement, site selection involved in cell cycle cytokinesis |
| *C5* | *lsk1* | - | + |  | Activation of bipolar cell growth, contractile ring maintenance involved in cell cycle cytokinesis, cytokinesis checkpoint, phosphorylation of RNA polymerase II C-terminal domain, positive regulation of septation initiation signaling cascade |
| *C6* | *mde3* | - - | + |  | Ascospore formation, protein phosphorylation, signal transduction |
| *C10* | *mph1* | - - - | + |  | Cellular protein localization, mitotic cell cycle spindle assembly checkpoing, protein phosphorylation, signal transduction |
| *C11* | *oca2* | - - | + |  | Cellular response to stress, negative regulation of transcription from RNA polymerase II promoter, negative regulation of transmembrane transport, protein phosphorylation, regulation of nitrogen utilization, signal transduction |
| *C12* | Wt1913 | - | + |  |  |
| *D1* | *pck1* | - | + |  | Activation of bipolar cell growth, intracellular signal transduction, protein phosphorylation, regulation of cell wall (1->3)-beta-D-glucan biosynthetic process, regulation of establishment or maintenance of cell polarity regulating cell shape, signal transduction |
| *D4* | *pef1* | 0 | ++ |  | Protein phosphorylation, regulation of transcription involved in G1/S phase of mitotic cell cycle, signal transduction, traversing start control point of mitotic cell cycle |
| *D7* | *pka1* | - | 0 |  | Activation of bipolar cell growth, age-dependent response to reactive oxygen species, camp-mediated signaling, cellular response to nitrogen starvation, chronological cell aging, induction of conjugation upon nitrogen starvation, negative regulation of transcription by glucose, protein phosphorylation, regulation of glycolysis |
| *D8* | *pmk1* | - | 0 |  | MAPK cascade, activation of bipolar cell growth, cell cycle cytokinesis, cellular response to stress, cellular sodium ion homeostasis, fungal-type cel wall organization or biogenesis, positive regulation of calcium-mediated signaling, protein phosphorylation, regulation of cell shape |
| *D10* | *ppk2* | - | + |  | Activation of bipolar cell growth, protein phosphorylation, signal transduction |
| *D11* | *ppk3* | - | + |  | protein phosphorylation, tRNA export from nucleus |
| *E3* | *ppk5* | 0 | ++ |  | Protein phosphorylation, signal transduction |
| *E4* | *ppk6* | - - | + |  | activation |
| *E7* | *ppk9* | - | 0 |  | Protein phosphorylation, signal transduction |
| *E9* | *ppk11* | - | 0 |  | Activation of bipolar cell growth, protein phosphorylation |
| *E11* | *ppk14* | - | 0 |  | Activation of bipolar cell growth, protein phosphorylation, response to pheromone, signal transduction |
| *F1* | *ppk16* | - | + |  | Activation of bipolar cell growth, protein phosphorylation, signal transduction |
| *F2* | *ppk18* | - - - | ++ |  | Intracellular signal transdcution, protein phosphorylation, regulation of transcription-DNA-dependent, two-component signal transduction system (phosphorelay) |
| *F3* | *ppk19* | 0 | ++ |  | Cellular response to stress, late endosome to vacuole transport, protein phosphorylation, retrograde transport-endosome to Golgi, signal transduction |
| *F4* | *ppk20* | - - - | ++ |  | Protein phosphorylation, signal transduction |
| *F5* | *ppk22* | - | + |  | Protein phosphorylation, response to pheromone, signal transduction |
| *F6* | *ppk23* | - - - | ++ |  | Activation of bipolar cell growth, protein phosphorylation, signal transduction |
| *F7* | *ppk24* | - - | 0 |  | Activation of bipolar cell growth, protein phosphorylation, signal transduction |
| *F8* | *ppk25* | - - | 0 |  | Protein phosphorylation, signal transduction |
| *F9* | *ppk26* | - - | + |  | mRNA 3’-end processing, postreplication repair, protein phosphorylation, signal transduction |
| *F10* | *ppk27* | - | 0 |  | Protein phosphorylation, signal transduction |
| *F11* | *ppk28* | - - - | 0 |  | Cytoplasmic translational initiation, mitotic cell cycle G1/S transition checkpoint, negative regulation of translational initiation in response to starvation, protein phosphorylation, regulation of translational initiation in response to osmotic stress |
| *G2* | *ppk30* | - | + |  | Actin cortical patch assembly, actin filament organization, protein phosphorylation, signal transduction |
| *G3* | *ppk31* | - | + |  | protein phosphorylation, signal transduction |
| *G5* | *ppk33* | - | + |  | protein phosphorylation, signal transduction |
| *G6* | *ppk34* | - - | + |  | Negative regulation of establishment or maintenance of bipolar cell polarity regulating cell shape, protein phosphorylation, signal transduction |
| *G7* | *ppk35* | - - | ++ |  | Ascospore-type prospore assembly, ascospore-type prospore membrane assembly, meiotic chromosome segregation, protein phosphorylation, regulation of vacuole fusion, non-autophagic, septation initiation signaling cascade |
| *G8* | *ppk36* | - | 0 |  | CVT pathway, autophagy, cellular response to nitrogen starvation, conjugation with cellular fusion, macroautophagy, positive regulation of macroautophagy, protein phosphorylation, signal transduction |
| *G9* | *ppk38* | - | + |  | Actin cortical patch assembly, actin filament organization, protein phosphorylation, signal transduction |
| *G11* | *sck1* | - | 0 |  | Intracellular signal transduction, protein phosphorylation, regulation of conjugation with cellular fusion, regulation of trehalose metabolic process |
| *H6* | *ssp1* | - - - | + |  | Actin filament depolymerization, activation of bipolar cell growth, cellular protein localization, cellular response to stress, establishment or maintenance of actin cyctoskeleton polarity, establishment or maintenance of cell polarity regulating cell shape, negative regulation of G0 to G1 transition, protein phosphorylation, signal transduction |
| *H7* | *ssp2* | - - | 0 |  | Activation of bipolar cell growth, negative regulation of cytoplasmic translation, protein phosphorylation, regulation of transcription by glucose, signal transduction |
| *H9* | *wee1* | - | + |  | DNA damage checkpoint, activation of bipolar cell growth, negative regulation of G2/M transition of mitotic cell cycle, negative regulation of cyclin-dependent protein kinase activity involved in G2/M, peptidyl-tyrosine phosporylation, regulation of cell size |
| *H10* | *wis1* | - | 0 |  | G1 to G0 transition, activation of bipolar cell growth, cellular response to hydrogen peroxide, cellular response to osmotic stress, protein phosphorylation, regulation of mitotic cell cycle, regulation of translation in response to stress, response to arsenic-containing substance, stress-activated MAPK cascade |
| *H11* | *wis4* | - | 0 |  | MAPK cascade, activation of bipolar cell growth, protein phosphorylation, regulation of mitotic cell cycle, stress-activated MAPK cascade, stress-activated protein kinase signaling cascade |

Table 2. BHT S/R Strains

| Well | Gene | Exhibited Sensitivity | Rescued by Sorbitol | Function | GO Annotation |
| --- | --- | --- | --- | --- | --- |
| *A1* | *bub1* | - | 0 |  | attachment of spindle microtubules to kinetochore, attachment of spindle microtubules to kinetochore involved in homologous chromosome segregation, cellular protein localization, histone H2A-S121 phosphorylation, meiotic sister chromatid cohesion, centromeric, mitotic cell cycle spindle assembly checkpoint, protein localization to kinetochore, signal tansduction |
| *A2* | *byr1* | - | + |  | MAPK cascade, cell cycle arrest in response to pheromone, cellular response to nitrogen starvation, protein phosphorylation, signal transduction involved in conjugation with cellular fusion |
| *A3* | *byr2* | - - | 0/+ |  | MAPK cascade, cell cycle arrest in response to pheromone, induction of conjugation upon nitrogen starvation, protein phosphorylation, signal transduction involved in conjugation with cellular fusion |
| *A4* | *cdr1* | - | + |  | activation of bipolar cell growth, negative regulation of G2/M transition of mitotic cell cycle, negative regulation of cyclin-dependent protein kinase activity, protein localization to medial cortex, protein phosphorylation, signal transduction, traversing start control point of mitotic cell cycle |
| *A5* | *cdr2* | - | + |  | Cellular protein localization, positive regulation of G2/M transition of mitotic cell cycle, protein localization to medial cortex, protein phosphorylation, regulation of G2/M transition of mitotic cell cycle, regulation of cell cycle cytokinesis, regulation of cell size, signal transduction |
| *A6* | *cds1* | - | + |  | Intra-S DNA damage checkpoint, mitotic cell cycle DNA replication and checkpoint, protein phosphorylation, signal transduction |
| *A7* | *cek1* | - | 0 |  | Activation of bipolar cell growth, protein phosphorylation, regulation of mitotic cell cycle, signal transduction |
| *A8* | *chk1* | - | + |  | Protein phosphorylation, regulation of cell shape, regulation of endocytosis, signal transduction |
| *A9* | *cki1* | - | + |  | Protein phosphorylation, regulation of 1-phosphatidylinositol-4-phosphatate 5-kinase activity, regulation of endocytosis, signal transduction |
| *A10* | *cki2* | - | + |  | Regulation of cell shape, protein phosphorylation, regulation of endocytosis, signal transduction |
| *A11* | *cki3* | - | + |  | protein phosphorylation, regulation of endocytosis, signal transduction |
| *A12* | wt972 | - | + |  |  |
| *B1* | *cmk1* | - | + |  | Activation of bipolar cell growth, calcium-mediated signaling, protein phosphorylation, regulation of mitotic cell cycle |
| *B2* | *cmk2* | - | + |  | Activation of bipolar cell growth, cellular response to oxidative stress, mitotic cell cycle DNA replication checkpoint, negative regulation of G2/M transition of mitotic cell cycle, stress-activated protein kinase signaling cascade |
| *B4* | *dsk1* | - | + |  | Intracellular protein kinase cascade, protein phosphorylation, regulation of mitotic cell cycle, regulation of nuclear mRNA splicing, via spliceosome |
| *B5* | *fin1* | - | 0 |  | barrier septum assembly involved in cell cycle cytokinesis, cellular protein localization, mitotic chromosome condensation, negative regulation of septation initiation signaling cascade, protein phosphorylation, regulation of mitiotic cell cycle, septation initiation signaling cascade, spindle assembly involved in mitosis |
| *B6* | *gad8* | - | + |  | TOR signaling cascade, induction of conjugation upon nitrogen starvation, negative regulation of establishment or maintenance of bipolar cell polarity regulating cell shape, protein phosphorylation, regulation of mitotic cell cycle |
| *B7* | *gsk3* | - | + |  | Activation of bipolar cell growth, positive regulation of chromosome segregation, protein phosphorylation, regulation of cell cycle cytokinesis, regulation of mitotic sister chromatid segregation, signal transduction |
| *B8* | *gsk31* | - | 0 |  | Protein phosphorylation, proteolysis, signal transduction |
| *B9* | *hhp1* | - - | 0 |  | Activation of bipolar cell growth, attachment of spindle microtubules to kinetochore involved in homologous chromosome segregation, homologous chromosome segregation, protein phosphorylation, regulation of DNA repair, signal transduction |
| *B10* | *hhp2* | - - | 0 |  | attachment of spindle microtubules to kinetochore involved in homologous chromosome segregation, homologous chromosome segregation, protein phosphorylation, regulation of DNA repair, signal transduction |
| *B11* | *hri1* | - - - | + |  | Cellular response to stress, cytoplasmic translational initiation, negative regulation of translational initiation in response to osmotic stress, protein phosphorylation |
| *B12* | wt972 | - | + |  |  |
| *C4* | *lkh1* | - | + |  | Activation of bipolar cell growth, cellular response to oxidative stress, intracellular signal transduction, negative regulation of filamentous growth, negative regulation of flocculation, protein phosphorylation, regulation of barrier septum assembly, regulation of cytokinetic cell separation, regulation of fungal-type cell wall organization |
| *C5* | *lsk1* | - | + |  | Activation of bipolar cell growth, contractile ring maintenance involved in cell cycle cytokinesis, cytokinesis checkpoint, phosphorylation of RNA polymerase II C-terminal domain, positive regulation of septation initiation signaling cascade |
| *C6* | *mde3* | - - | + |  | Ascospore formation, protein phosphorylation, signal transduction |
| *C10* | *mph1* | - - - | 0 |  | Cellular protein localization, mitotic cell cycle spindle assembly checkpoint, protein phosphorylation, signal tranduction |
| *C11* | *oca2* | - - | 0 |  | Cellular response to stress, negative regulation of transcription from RNA polymerase II promoter, negative regulation of transmembrane transport, protein phosphorylation, regulation of nitrogen utilization, signal transduction |
| *C12* | Wt1913 | - - | + |  |  |
| *D7* | *pka1* | - | + |  | Activation of bipolar cell growth, age-dependent response to reactive oxygen species, camp-mediated signaling, cellular response to nitrogen starvation, chronological cell aging, induction of conjugation upon nitrogen starvation, negative regulation of transcription by glucose, protein phosphorylation, regulation of glycolysis |
| *D9* | *pom1* | - | + |  | actin filament bundle distribution, activation of bipolar cell growth, cell morphogenesis involved in conjugation with cellular fusion, cellular protein localization, negative regulation of G2/M transition of mitotic cell cycle, negative regulation of establishment of contractile ring localization involved in cell cycle cytokinesis, protein localization to medial cortex, protein phosphorylation, regulation of cell cycle cytokinesis, regulation of cell size, regulation of establishment or maintenance of cell polarity regulating cell shape, signal transduction |
| *D10* | *ppk2* | - | 0 |  | Activation of bipolar cell growth, protein phosphorylation, signal transduction |
| *D11* | *ppk3* | - | 0 |  | protein phosphorylation, tRNA export from nucleus |
| *E9* | *ppk11* | - | + |  | Activation of bipolar cell growth, protein phosphorylation |
| *E11* | *ppk14* | - | + |  | Activation of bipolar cell growth, protein phosphorylation, response to pheromone, signal transduction |
| *F2* | *ppk18* | - | + |  | Intracellular signal transdcution, protein phosphorylation, regulation of transcription-DNA-dependent, two-component signal transduction system (phosphorelay) |
| *F4* | *ppk20* | + | + |  | Protein phosphorylation, signal transduction |
| *F7* | *ppk24* | - | 0 |  | Activation of bipolar cell growth, protein phosphorylation, signal transduction |
| *F8* | *ppk25* | - | 0 |  | Protein phosphorylation, signal transduction |
| *F10* | *ppk27* | - | 0 |  | Protein phosphorylation, signal transduction |
| *F11* | *ppk28* | - - | 0 |  | cytoplasmic translational initiation, mitotic cell cycle G1/S transition checkpoint, negative regulation of translational initiation response to starvation, protein phosphorylation, regulation of translational initiation response to osmotic stress |
| *G1* | *ppk29* | + | + |  | actin cortical patch assembly, actin filament organization, biological regulation, protein phosphorylation |
| *G2* | *ppk30* | + | 0 |  | Actin cortical patch assembly, actin filament organization, protein phosphorylation, signal transduction |
| *G3* | *ppk31* | - | + |  | protein phosphorylation, signal transduction |
| *G5* | *ppk33* | - | + |  | protein phosphorylation, signal transduction |
| *G6* | *ppk34* | - | 0 |  | Negative regulation of establishment or maintenance of bipolar cell polarity regulating cell shape, protein phosphorylation, signal transduction |
| *G7* | *ppk35* | - | 0 |  | ascospore-type prospore assembly, ascospore-type membrane assembly, meiotic chromosome segregation, protein phosphorylation, regulation of vacuole fusion-non-autophagic, septation initiation signaling cascade |
| *H9* | *wee1* | -/+ | 0 |  | DNA damage checkpoint, activation of bipolar cell growth, negative regulation of G2/M transition of mitotic cell cycle, negative regulation of cyclin-dependent protein kinase activity involved in G2/M, peptidyl-tyrosine phosphorylation, regulation of cell size |

Table 3. BPA S/R Strains

| Well | Gene | Exhibited Sensitivity | Rescued by Sorbitol | Function | GO Annotation |
| --- | --- | --- | --- | --- | --- |
| *A3* | *byr2* | - | 0 |  | MAPK cascade, cell cycle arrest in response to pheromone, induction of conjugation upon nitrogen starvation, protein phosphorylation, signal transduction involved in conjugation with cellular fusion |
| *A10* | *cki2* | + | 0 |  | Protein phosphorylation, regulation of cell shape, regulation of endocytosis, signal transduction |
| *B1* | *cmk1* | - | 0 |  | Activation of bipolar cell growth, calcium-mediated signaling, protein phosphorylation, regulation of mitotic cell cycle |
| *B2* | *cmk2* | + | 0 |  | Activation of bipolar cell growth, cellular response to oxidative stress, mitotic cell cycle DNA replication checkpoint, negative regulation of G2/M transition of mitotic cell cycle, stress-activated protein kinase signaling cascade |
| *B5* | *fin1* | - | + |  | Barrier septum assembly involved in cell cycle cytokinesis, cellular protein localization, mitotic chromosome condensation, negative regulation of septation initiation signaling cascade, protein phosphorylation, regulation of mitotic cell cycle, septation initiation signaling cascade, spindle assembly involved in mitosis |
| *B9* | *hhp1* | - | + |  | Activation of bipolar cell growth, attachement of spindle microtubules to kinetochore involved in homologous chromosome segregation, protein phosphorylation, regulation of DNA repair, signal transduction |
| *B10* | *hhp2* | - | + |  | attachement of spindle microtubules to kinetochore involved in homologous chromosome segregation, homologous chromosome segregation, protein phosphorylation, regulation of DNA repair, signal transduction |
| *B11* | *hri1* | - | + |  | Cellular response to stress, cytoplasmic translational initiation, negative regulation of translational initiation in response to osmotic stress, protein phosphorylation |
| *C6* | *mde3* | - | + |  | Ascospore formation, protein phosphorylation, signal transduction |
| *C10* | *mph1* | - | + |  | Cellular protein localization, mitotic cell cycle spindle assembly checkpoint, protein phosphorylation, signal transduction |
| *D5* | *pek1* | - | + |  | MAPK cascade, activation of bipolar cell growth, cell cycle cytokinesis, cellular sodium ion homeostasis, fungal-type cell wall organization or biogenesis, positive regulation of calcium-mediated signaling, protein phosphorylation, regulation of cell shape |
| *F3* | *ppk19* | - | 0 |  | Cellular response to stress, late endosome to vacuole transport, protein phosphorylation, retrograde transport, endosome to Golgi, signal transduction |
| *F4* | *ppk20* | - | + |  | Protein phosphorylation, signal transduction |
| *F5* | *ppk22* | + | 0 |  | Protein phosphorylation, response to pheromone, signal transduction |
| *F10* | *ppk27* | - | + |  | Protein phosphorylation, signal transduction |
| *F11* | *ppk28* | - | + |  | cytoplasmic translational initiation, mitotic cell cycle G1/S transition checkpoint, negative regulation of translational initiation response to starvation, protein phosphorylation, regulation of translational initiation response to osmotic stress |
